1 Camilo A. Calderón-Acevedo  
2 camilo.calderon@umsl.edu  
3

4 Taxonomy of large *Anoura*

5 **Large *Anoura* (Chiroptera:Glossophaginae) taxonomy, taxonomic status of *Anoura***  
6 ***carishina*, and implications for the distribution of *Anoura latidens* in Colombia.**

7 Camilo A. Calderón-Acevedo\*, Miguel E. Rodríguez-Posada and Nathan Muchhala  
8 *Department of Biology, University of Missouri – St. Louis, One University Blvd St. Louis,*  
9 *Missouri 63121. USA. (CAC and NM)*

10 *La Palmita Natural Reserve Foundation, Research Center, Territorial studies for the use*  
11 *and conservation of biodiversity research group, Carrera 4 No 58–59, Bogotá,*  
12 *Colombia. (MRP)*

13

14 The *Anoura geoffroyi* species complex is composed of 3 large species: *A. geoffroyi*, *A.*  
15 *peruana*, and *A. carishina*. Several inconsistencies arise from the description of *A.*  
16 *carishina*, and given the lack of a comparison with the dentition and external characters  
17 of *A. latidens*, here we compare the taxonomic characters of these species. To understand  
18 the position of *A. carishina* in the morphospace occupied by large *Anoura*, we conducted  
19 a Principal Component Analysis on 12 craniodental and 11 external variables. We  
20 complement our results with further analysis of traits thought to be diagnostic for these  
21 species, including 1) an elliptical Fourier transformation analysis of the shape of the third  
22 upper premolar (P4), 2) a comparison of the area of the second (P3) and third (P4) upper  
23 premolars, and 3) a comparison of maxillary tooththrow angles. We find that *A. carishina*  
24 is morphologically indistinguishable from *A. latidens*, and that there is broad overlap in

25 morphology between *A. latidens* and *A. geoffroyi*. However several characters found in *A.*  
26 *latidens* are lacking in *A. geoffroyi*, including a triangular shape to the P4 caused by a  
27 medial-internal cusp enclosed by the base of the tooth, a lack of development of the  
28 anterobasal cusp in the P3, a smaller braincase, and a shorter rostrum. We reassess the  
29 distribution of *Anoura latidens* in Colombia, adding new records and correcting  
30 previously-published records that were misidentified. Overall, our results suggest that a  
31 stable taxonomy for the group should consider *A. carishina* as a junior synonym of *A.*  
32 *latidens*, and that, although *A. latidens* is distinguishable from *A. geoffroyi*, further  
33 genetic and taxonomic work is needed in to clarify species limits within the *A. geoffroyi*  
34 species complex.

35

36 El complejo de especies *Anoura geoffroyi* se compone de 3 especies , *A. geoffroyi*, *A.*  
37 *peruana*, y *A. carishina*. La descripción de *Anoura carishina* posee varias  
38 inconsistencias, y dado que no se realizó una comparación con *A. latidens*, realizamos  
39 una comparación de los caracteres taxonómicos de ambas especies. Para entender la  
40 posición de *A. carishina* en el morfoespacio ocupado por los *Anoura* grandes realizamos  
41 un Análisis de Componentes Principales usando 12 variables cráneo-dentales y 11  
42 variables externas. Complementamos nuestros resultados con 1) un análisis de  
43 transformación elíptica de Fourier de la forma del tercer premolar superior (P4) 2) una  
44 comparación del área del segundo (P3) y tercer (P4) premolares superiores y 3) una  
45 comparación de los ángulos de las hileras dentales maxilares. Encontramos que *A.*  
46 *carishina* es morfológicamente indistinguible de *A. latidens* y que existe una amplio  
47 superposición en la morfología de *A. latidens* y *A. geoffroyi*. Sin embargo, la forma del

48 P4, una cúspide anterobasal no desarrollada en el P3, y caracteres relacionados con una  
49 caja craneana menos inflada y un rostro corto son útiles en distinguir *A. latidens* de *A.*  
50 *geoffroyi*. Reevaluamos la distribución de *Anoura latidens* en Colombia, al agregar  
51 nuevos registros y corrigiendo registros previamente publicados que se encontraban mal  
52 identificados. En general, nuestros resultados sugieren que una taxonomía estable para el  
53 grupo debería considerar a *A. carishina* como un sinónimo junior de *A. latidens*, que *A.*  
54 *latidens* es distinguible de *A. geoffroyi* utilizando medidas cráneo-dentales y resalta la  
55 necesidad de estudios genéticos para esclarecer las relaciones filogenéticas entre *A.*  
56 *latidens* y el complejo de especies *A. geoffroyi*.

57

58 Key words: Chiroptera, Colombia, distribution, elliptical Fourier transformation,  
59 morphometry, nectarivorous bat, shape analysis

60 \*Correspondent: [camilo.calderon@umsl.edu](mailto:camilo.calderon@umsl.edu)

61

62

63

64

65

66

67

68

69

70

71 *Anoura* is one of the most species-rich genera in the subfamily Glossophaginae. It is  
72 currently comprised of 10 species, although not all are widely accepted species (Handley  
73 1984, Mantilla-Meluk & Baker 2006, Griffiths & Gardner 2007 [2008], Jarrín-V & Kunz  
74 2008, Mantilla-Meluk & Baker 2010, Pacheco et al. 2018). The genus is subdivided into  
75 two groups based on dental morphology and size (Allen 1898, Griffiths & Gardner 2007  
76 [2008]), with five small species (*A. caudifer*, *A. aequatoris*, *A. cadenai*, *A. fistulata* and  
77 *A. luismanueli*) and five large species (*A. carishina*, *A. cultrata*, *A. geoffroyi*, *A. peruana*  
78 and *A. latidens*). Mantilla-Meluk and Baker (2010) designated three of these large species  
79 (along with their subspecies) as the *A. geoffroyi* species complex, including *A. carishina*,  
80 *A. geoffroyi geoffroyi*, *A. geoffroyi lasiopyga* and *A. peruana*, and also elevated *A.*  
81 *peruana* to a separate species rather than a subspecies of *A. geoffroyi*.

82 *Anoura carishina* Mantilla-Meluk and Baker 2010 is only known to date from the  
83 5 specimens of the type series deposited at the Mammal Collection Alberto Cadena  
84 García at Instituto de Ciencias Naturales (Universidad Nacional, Bogotá, Colombia). Its  
85 distribution is limited to 3 localities in the western slopes of the southern Colombian  
86 Andes and the Sierra Nevada de Santa Marta, a mountain system isolated from the Andes  
87 in the north of Colombia. The type ICN-14530 and paratype ICN-14531 are from  
88 Taminango, Nariño department (1.67°, -77.32°). The two other localities are San Pedro de  
89 La Sierra, Sierra Nevada de Santa Marta, department of Magdalena (10.90°, -74.04°) for  
90 paratypes ICN-5224, 5225 and Cali, Pance, department of Valle del Cauca (3.32°, -  
91 76.63°) for paratype ICN-5938. *Anoura carishina* was described as a large *Anoura* with  
92 the following diagnostic characters: greatest length of skull less than 24.5 mm, small  
93 canines, P4 teeth with a wide triangular base, and complete zygomatic arches (although

94 they are broken in several of the type series collections; (Mantilla-Meluk & Baker 2010)).  
95 However, in the description it was only explicitly compared to the subspecies of *Anoura*  
96 *geoffroyi* (*A. g. geoffroyi*, *A. g. lasiopyga*) and *A. peruana* - it was not compared to *A.*  
97 *latidens*, a species to which it bears resemblance in dental morphology, size, and  
98 coloration.

99 *Anoura latidens* Handley 1984 is described as a large species of *Anoura*,  
100 distinguishable from *A. geoffroyi* by a relatively short rostrum, an inflated braincase,  
101 nearly parallel maxillary tooththrows, and smaller and more robust premolars which have a  
102 quadrangular appearance when viewed from above. More specifically, Handley (1984)  
103 states that the third upper premolar (P4) has a medial-internal cusp enclosed in the  
104 triangular base of the tooth (rather than an abruptly protruding cusp as in *A. geoffroyi*)  
105 and that the second upper premolar (P3) possesses a reduced anterobasal cusp. The  
106 holotype is from Pico Ávila, Caracas, Venezuela, and the species has been reported for at  
107 least 14 localities in Venezuela (Handley 1976, 1984, Linares 1986, 1998), where it  
108 occupies a variety of ecosystems with an altitudinal range from 50 to 2600 meters above  
109 sea level. Outside of Venezuela *A. latidens* has only been registered in a handful of  
110 localities in Colombia, Guyana, and Peru (Handley 1984, Linares 1998, Solari et al.  
111 1999, Lim & Engstrom 2001), suggesting a wide yet discontinuous distribution.

112 In Colombia, *Anoura latidens* is distributed in the Andean region (eastern, central,  
113 and western mountain ranges) and the inter-Andean valleys (Alberico et al. 2000, Solari  
114 et al. 2013). The first record for the country was mentioned in the species description  
115 (Handley 1984) as collected by Nicéforo María in 1923 in San Juan de Rioseco,  
116 department of Cundinamarca, on the western slope of the Cordillera Oriental (eastern

117 mountain range) above the inter-Andean valley of the Magdalena river at a height of  
118 1000 meters above sea level. Later Muñoz (2001) attributed the first record to Wilson &  
119 Reeder (1993) and added a new locality in the Cordillera Oriental (eastern mountain  
120 range) in the municipality of Gramalote, Norte de Santander department, however they  
121 did not give a catalog number for this collection supposedly located in the Museo de  
122 Ciencias Naturales de La Salle. Two other localities are reported by Rivas-Pava et al.  
123 (2007) based on three specimens deposited at Museo de Historia Natural de la  
124 Universidad del Cauca (MHNUC) from the municipalities of Acevedo (Huila  
125 department) and Argelia (Cauca department). The most recent recorded locality is  
126 Reserva Forestal Bosque de Yotoco (Valle del Cauca department) in the southwestern  
127 Andes, with one specimen deposited in the Instituto de Ciencias Naturales (ICN)  
128 mammal collection (Mora-Beltrán & López-Arévalo 2018). With only 5 localities, the  
129 knowledge of *A. latidens* in Colombia is scarce, which impacts the understanding of its  
130 conservation threats.

131 In this study we use morphometric approaches to reevaluate the taxonomy of the  
132 *A. geoffroyi* species complex. We focus particularly on the extent to which *A. carishina*  
133 and *A. latidens* are distinguishable from each other and other species in the complex. We  
134 also examine all known Colombian records of *A. latidens* to evaluate its distribution  
135 within the country.

136

137

## MATERIALS AND METHODS

138

139

We measured 260 individuals from the *A. geoffroyi* species complex, including 5  
*A. carishina*, 48 *A. peruana*, 59 *A. latidens*, and 148 *A. geoffroyi* (106 *A. g. geoffroyi* and

140 42 *A. g. lasiopyga*) (See Supplementary Data SD1 for specimens reviewed and  
141 measured). We measured 12 cranial and 11 postcranial variables to the nearest 0.01 mm.  
142 Craniodental characters included: greatest length of skull (GLS, distance from the most  
143 posterior point of the skull to the most anterior point of the premaxilla not including  
144 incisors), condylobasal length (CBL, distance from the most posterior point of the  
145 condyles to the most anterior point of the premaxilla not including incisors), postorbital  
146 breadth (PB, minimum interorbital distance measured across the frontals), braincase  
147 breadth (BCB, greatest breadth of the braincase, not including the mastoid and  
148 paraoccipital processes), height of braincase (HBC, distance from the ventral border of  
149 the foramen magnum to the parietal), mastoid breadth (MB, greatest width at the mastoid  
150 processes), maxillary tooth-row length (MTRL, distance from the most posterior point of  
151 the third upper premolar to the most anterior point of the upper canine), palatal length  
152 (PL), breadth across third upper molars (M3-M3), breadth across upper canines (C-C),  
153 mandibular length (MANL, distance from the condyles to the anterior face of the  
154 mandible) and mandibular tooth-row length (MANTRL, distance from canine to the third  
155 mandibular molar). Postcranial measurements included: forearm (FA, measured from the  
156 olecranon to the articulation of the wrist), length of 3<sup>rd</sup> (D3MC), 4<sup>th</sup> (D4MC) and 5<sup>th</sup>  
157 (D5MC) metacarpals, length of the 1<sup>st</sup> and 2<sup>nd</sup> phalanxes of 3<sup>rd</sup> (D3P1, D3P2), 4<sup>th</sup> (D4P1,  
158 D4P2) and 5<sup>th</sup> (D5P1, D5P2) digit, and length of the tibia (Tibia). Measurements were  
159 selected based on their frequent use in bat taxonomy (Handley 1960, Nagorsen & Tamsitt  
160 1981, Handley 1984, Velazco 2005, Mantilla-Meluk & Baker 2006, Velazco & Patterson  
161 2008, Mantilla-Meluk & Baker 2010, Velazco & Simmons 2011). Note that our  
162 measurement of the greatest length of the skull differs from that in the description of

163 *Anoura carishina* (Mantilla-Meluk & Baker 2010) in that we measure from the posterior-  
164 most point of the occipital to the anterior-most point in the premaxilla (excluding  
165 incisors), the same measurement used in all other *Anoura* descriptions (Handley 1960,  
166 1984, Molinari 1994, Muchhala et al. 2005), while in its description *A. carishina* and the  
167 specimens to which it was compared were measured from the posterior-most point of the  
168 occipital to the anterior-most point of the nasal bones. To analyze the morphospace of  
169 *Anoura* and explore the morphometric variation of our traits, we performed a Principal  
170 Component Analysis (PCA) for 2 data sets. One dataset ( $n = 202$ ) includes only the 12  
171 craniodental measurements; the second dataset ( $n = 125$ ) includes all 23 craniodental and  
172 postcranial measurements. Both datasets include representatives of all species of *Anoura*.

173 To test the reliability of dental characters distinguishing *A. latidens* and *A.*  
174 *carishina* from *A. geoffroyi*, we traced the contour of the premolars from digital  
175 photographs of the ventral view of the skull of 70 *A. latidens*, 36 *A. geoffroyi*, 7 *A.*  
176 *peruana* and 5 *A. carishina*. We took each photograph next to a band of millimeter paper  
177 in order to standardize measurements. We selected the contour of the P3 and P4 using  
178 ImageJ (Schneider et al. 2012), and obtained the area of this contour using the “Measure”  
179 function. To quantify the shape of the P4 (irrespective of size) we transformed every  
180 contour image of the P4 to a binary image in Image J (Schneider et al. 2012) and then  
181 employed an elliptical Fourier transformation on these images. Using SHAPE v1.3 (Iwata  
182 & Ukai 2002) this contour was transformed into chain code, assigning a string of code  
183 that represents the perimeter of every image of the third upper premolar, which was then  
184 used to create a harmonic or elliptical Fourier descriptor (EFDs) series. This approach



185 allowed us to quantify the shape using 20 harmonics, which were used as input for a  
186 PCA.

187         Aside from tooth morphology, another character cited by Handley (1984) as  
188 important in distinguishing *A. latidens* from *A. geoffroyi* is that the former have nearly  
189 parallel maxillary tooththrows. To quantify this, we used ImageJ to overlay lines over  
190 images of the occlusal view of the maxillae for 5 *A. latidens*, 34 *A. geoffroyi*, 4 *A.*  
191 *peruana* and 66 *A. carishina*. Specifically, these lines connected the metastyle of the third  
192 upper molar (M3) to the most anterior point of the canines for each tooththrow (See  
193 Supplementary Data SD 3, Fig. 3). We then measured the angle between these lines.

194         We tested for significant differences between *A. geoffroyi*, *A. latidens*, *A. peruana*  
195 and *A. carishina* in 1) craniodental measurements (including those related to rostrum  
196 length and an inflated braincase) 2) P4 and P3 size (e.g. total surface area), 3) the shape  
197 of P4 (EFD principal components) and 4) the tooththrow angle using a Multivariate  
198 Analysis of Variance (MANOVA) followed by Bonferroni-corrected posthoc tests for  
199 each variable.

200         To assess the geographical distribution of *A. latidens* we reviewed the published  
201 records and examined the skulls of specimens labeled as *A. geoffroyi* and *A. caudifer* in  
202 the following collections: Colección de Mamíferos Alberto Cadena García at Instituto de  
203 Ciencias Naturales de la Universidad Nacional de Colombia (ICN), Instituto de  
204 Investigación en Recursos Biológicos Alexander von Humboldt (IAvH), Museo  
205 Universidad Distrital Francisco José de Caldas (MUD), Museo de Historia Natural de la  
206 Universidad del Cauca (MHNUC), Colección Teriológica Universidad de Antioquia  
207 (CTUA), National Museum of Natural History (USNM), Muséum d'Histoire Naturelle de

208 la Ville de Genève (MHNG), American Museum of Natural History (AMNH), and Field  
209 Museum of Natural History (FMNH).

210

211

## RESULTS

212 *Morphological revision.* —. The type specimen of *A. carishina* (ICN 14530) evidences  
213 the dental characters provided in the description of *A. latidens* (Handley 1984). It has  
214 broad molars and premolars with the anterobasal cusp of the second upper premolar (P3)  
215 reduced and the medial-internal cusp of the third upper premolar (P4) enclosed in a  
216 triangular base. When comparing the type of *A. latidens* to the type series of *A. carishina*  
217 we find that specimens ICN 14530, 14531, 5224 and 5225 possess both characteristics,  
218 while specimen ICN 5838 possesses neither and is instead diagnosable as *A. geoffroyi*  
219 (Fig.1). In our review of the type material, we also discovered that the specimen labeled  
220 as the holotype in Figure 4 of Mantilla-Meluk and Baker (2010) is in fact ICN-5225,  
221 while the specimen labeled as ICN-5225 is actually the type (ICN-5225 is a female  
222 paratype that possesses both auditory bullae, while ICN 14530 is a male specimen lacks  
223 the right auditory bulla; see Supplementary Data SD 3, Supplementary Fig. 1).

224 In our review of previously-published records of *Anoura latidens* in Colombia, we  
225 find that only 2 are valid, including specimen AMNH-69187 used in the species  
226 description (Handley 1984) and ICN 22807 from Reserva Forestal Bosque de Yotoco,  
227 municipality of Yotoco, department of Valle del Cauca (Mora-Beltrán & López-Arévalo  
228 2018). The *A. latidens* specimens reported by Rivas-Pava et al. (2007) from the  
229 municipalities of Acevedo (department of Huila; MHNUC-M0722, 0723) and Argelia  
230 (department of Cauca; MHNUC-M1552) actually correspond to individuals of *A.*

231 *geoffroyi*, while there is no record of the *A. latidens* specimen reported by Muñoz (2001)  
232 in the mammal collection of Colegio San Jose de la Salle. The two putative records of *A.*  
233 *latidens* that we did find in this collection were both captured in Gramalote (Norte de  
234 Santander, Colombia) and are diagnosable as *Glossophaga soricina*.

235 On the other hand, among all of the collections we reviewed we found a total of 3  
236 *Anoura latidens* specimens that were misidentified as other *Anoura* species. Specimens  
237 ICN 4398, ICN 11195, and MUD 587 coincide with the dental characters of *A. latidens*  
238 proposed by Handley (1984). ICN 4398 is an adult male, preserved as a skin and  
239 extracted skull. This record is located in the inter-Andean valley of the Cauca River,  
240 between the Cordillera Central and Cordillera Occidental (central and western mountain  
241 ranges). ICN 11195 is an adult male, preserved as a skin and extracted skull. It was  
242 collected in Parque Regional Natural Ucumarí, Vereda la Suiza, city of Pereira,  
243 department of Risaralda. This locality is situated in the protected area Santuario de Fauna  
244 y Flora Otún Quimbaya and resides in the western slope of the Cordillera Central (central  
245 mountain range) at an elevation of 1900 meters. MUD 587 is an adult male, preserved as  
246 a skin and extracted skull. It was collected in Vereda La Huerta, municipality of La Vega,  
247 department of Cundinamarca on the western slope of the Cordillera Oriental (eastern  
248 Andes) at an elevation of 980 meters (see Supplementary Data SD1).

249 *Morphometric analyses.* — The type series of *A. carishina* overlaps with both *A. latidens*  
250 and the *A. geoffroyi* species complex (*A. g. geoffroyi*, *A. g. lasiopyga* and *A. peruana*) in  
251 most of its measurements (Supplementary Data SD2). For the dataset with all  
252 measurements (Fig 2. A), our principal component analysis shows that less than 50% of  
253 the variation is explained by the first two principal components of the PCA (PC1 33.2%,

254 PC2 10.7%). We recover similar results when only craniodontal measurements (Fig 2. B)  
255 are taken into account (PC1 40 %, PC2 17.2%). Most of the morphospace of *A. latidens*  
256 and the *A. geoffroyi* species complex is shared in both datasets (Fig. 2, see Supplementary  
257 Data 3, supplementary Fig. 1 for the distribution of *A. g. geoffroyi*, *A. g. lasiopyga* and *A.*  
258 *peruana* in the morphospace).

259 P4 shape (PCA on 20 EFDs) resulted in over 80% of the variation in the shape of  
260 the P4 (Fig. 3) being explained by the first two principal components (PC1 71.83% and  
261 PC2 13.07 %). We see that the type specimen of *Anoura carishina* (ICN 14530) is in the  
262 center of the morphospace occupied by *A. latidens*, with the position of the *A carishina*  
263 paratype diagnosable as *A. g. geoffroyi* (ICN 5938) closer to the morphospace of *A. g.*  
264 *geoffroyi*. Despite evidencing different morphological clusters corresponding to *A. g.*  
265 *geoffroyi* (with *A. peruana* immersed in its morphospace) and *A. latidens*, the  
266 morphospace of the shape of P4 does not show a clear separation between them, with  
267 some specimens of *A. g. geoffroyi*, *A. peruana* and *A. latidens* occupying the space  
268 between clusters (Fig. 3).

269 The Multivariate analysis of variance (MANOVA) of morphometric  
270 measurements showed overall significant differences for each measurement (Pillai's  
271 Trace and Wilks' Lamda  $P < 0.001$ ) with the exception of postorbital breadth (PB;  
272  $F_{3,121} = 1.023$ ,  $P = 0.385$ ) and forearm length (FA;  $F_{3,121} = 0.223$ ,  $P = 0.881$ ) (Table 2).  
273 Bonferroni corrected  $P$  values show significant differences between *A. latidens* and *A.*  
274 *carishina* only in height of braincase (HBC;  $P = 0.030$ ), while *A. g. geoffroyi* and *A.*  
275 *latidens* have significant differences in the means of all except postorbital breadth (PB;  
276  $P = 1.0$ ), height of braincase (HBC;  $P = 0.166$ ), and forearm length (FA;  $P = 1.0$ ). Of

277 particular note are significant differences in measurements related to the overall shorter  
278 rostrum and less inflated braincase of *A. latidens*, as these features were highlighted by  
279 Handley (1984) in the description of this species. Specifically, *A. latidens* has a shorter  
280 greatest length of skull (GLS), palate length (PL), maxillary tooththrow length (MTRL),  
281 braincase breadth (BCB) and mastoid breadth (MB) in comparison to *A. geoffroyi* and *A.*  
282 *peruana* (see Table 2, SD2). Between these latter two species, *Anoura peruana* only  
283 showed significant differences with *A. geoffroyi* in height of braincase (HBC;  $P=0.043$ ).

284 Our MANOVA on premolar shape and tooththrow angle (Table 3) showed  
285 significant differences between species in the area of P4 ( $F_{3,105}=14.878$ ,  $P<0.001$ ), PC1  
286 of P4 shape (EFDs;  $F_{3,105}=103.508$ ,  $P<0.001$ ) and tooththrow angles (TRA,  $F_{3,105}=3.157$ ,  
287  $P=0.028$ ). Bonferroni-corrected posthoc tests show that *A. latidens* has a larger P4 area  
288 ( $X\bar{\square}=0.69\text{ mm}^2$ ) than *A. carishina* ( $X\bar{\square}=0.61\text{ mm}^2$ ,  $P=0.049$ ), *A. g. geoffroyi* ( $X\bar{\square}=0.61$   
289  $\text{mm}^2$ ,  $P<0.001$ ), and *A. peruana* ( $X\bar{\square}=0.56\text{ mm}^2$ ,  $P=0.002$ ). The first principal  
290 component of the P4 shape showed significant differences between *A. g. geoffroyi* and  
291 both *A. carishina* and *A. latidens*, and between *A. peruana* and *A. latidens* ( $P<0.001$ ),  
292 while *A. peruana* was not different from *A. g. geoffroyi* ( $P=0.112$ ) or *A. carishina*  
293 ( $P=0.079$ ). Notably, *A. carishina* is not significantly different from *A. latidens* for any of  
294 these traits except P4 area, and the four specimens of *A. carishina* diagnosable as *A.*  
295 *latidens* fall completely within the range of *A. latidens* variation in P4 area (Fig. 3).  
296 Tooththrow angle was significantly different overall between species, however none of the  
297 Tukey nor Bonferroni corrected posthoc tests were significant between specific pairs of  
298 species (Table 3).

299

300

## DISCUSSION

301           Upon revision of the type material of *Anoura carishina* and *A. latidens* we find  
302 that the type series of *A. carishina* is a mixed series of four individuals corresponding to  
303 *A. latidens* and one to *A. g. geoffroyi*. Our analyses of craniodental measurements and  
304 premolar shape of individuals of all species and subspecies in the *Anoura geoffroyi*  
305 complex (*A. geoffroyi*, *A. latidens*, *A. carishina*, and *A. peruana*) find no support for  
306 considering *Anoura carishina* as an entity morphologically distinct from *A. latidens*. Our  
307 results also clarify the characters that distinguish *A. latidens* from *A. geoffroyi*, expand  
308 the known distribution of *A. latidens* in Colombia, and raise issues regarding the  
309 conservation of this species in the country.

310

311 *Taxonomic identity of A. carishina*— Our different lines of evidence lead us to formally  
312 treat *Anoura carishina* as a junior synonym of *A. latidens*. First, the triangular base of the  
313 third upper premolar P4 of the type specimen of *A. carishina* (ICN 14530) is  
314 indistinguishable from *A. latidens*, as demonstrated by our analyses of tooth shape (Fig.  
315 3), as are those of three of the paratypes. Second, we find all four of these specimens also  
316 lack a developed anterobasal cusp in the second upper premolar (P3). And finally, none  
317 of the 18 morphological measurements differ between *A. latidens* and the *A. carishina*  
318 specimens (Table 2 and 3) with the exception of the height of the brain case (HBC;  
319  $P=0.030$ ) and P4 area ( $P=0.049$ ), and in both of these cases there is still extensive overlap  
320 in the range of measurements (HBC: 7.14-8.07 mm for *A. latidens* vs. 7.72-8.30 mm for  
321 *A. carishina*; P4 area: 0.56-0.86 mm<sup>2</sup> for *A. latidens* vs. 0.50-0.70 mm<sup>2</sup> for *A. carishina*).  
322 Given the above evidence, the holotype and three of the paratypes are diagnosable as

323 individuals of *A. latidens*. The fourth paratype (ICN 5938) falls within the morphospace  
324 of *A. g. geoffroyi* and presents a developed anterobasal cusp in the second upper  
325 premolar, supporting its identification as *A. geoffroyi*.

326 *Diagnosis of A. latidens and A. geoffroyi*— Our morphometric analysis of craniodental  
327 measurements shows that *A. latidens* shares morphospace with *A. g. geoffroyi* and *A.*  
328 *peruana*. Of the traits mentioned by Handley (1984) to diagnose *A. latidens* from *A.*  
329 *geoffroyi*, we found several to still be reliable in our larger dataset in separating *A.*  
330 *latidens* from the *A. geoffroyi* species complex, including a more robust and more  
331 triangular third upper premolar (P4; see Fig. 3), a reduced anterobasal cusp of second  
332 upper premolar (P3), and a shorter rostrum (in terms of GLS, PL, MANL; Table 2,  
333 Supplementary Data SD2). We add to this list mastoid breadth (MB) and mandibular  
334 tooth row length (MANTRL), which are also smaller for *A. latidens* (Table 2,  
335 Supplementary Data SD2). Toothrow angle, which Handley (1984) suggested is more  
336 parallel for *A. latidens*, did not in fact show significant differences (after Tukey and  
337 Bonferroni corrected posthoc tests) between any of the species in our analyses (Table 3).  
338 Finally, although Handley (1984) suggested that *A. latidens* has a more inflated  
339 braincase, we found that its braincase (BCB, Table 2, Supplementary Data SD2) is in fact  
340 significantly less inflated than *A. geoffroyi* and *A. peruana*.

341

342 *Distribution and implications for the conservation of Anoura latidens in Colombia* — By  
343 combining the 2 valid previously-published records of *Anoura latidens* in Colombia  
344 (Handley 1984, Mora-Beltrán & López-Arévalo 2018) with the 7 records we found here,  
345 we report *A. latidens* in 7 localities across the country (Fig. 4, Supplementary Data SD1).

346 With the exception of the Sierra Nevada de Santa Marta, all localities fall within highly  
347 altered ecosystems (IAvH 2004). Vereda El Hormiguero (ICN 4398) is located in a sugar  
348 cane agricultural system, even at the time of the capture of the specimen (Arata et al.  
349 1967). San Juan de Rioseco (AMNH 69187) and Vereda La Huerta (MUD 587) are  
350 mountainous areas with a landscape composed of ranching pastures, small agricultural  
351 fields, and fragments of natural forests. Vereda La Suiza (ICN 11195) presents a  
352 heterogeneous forest cover composed of fragments of natural forests, secondary forests,  
353 and reforested areas; it is part of the Santuario de Fauna y Flora Otún Quimbaya,  
354 registered in the Colombian National System of Protected Areas (SINAP) (Estrada-  
355 Villegas et al. 2010). Reserva Forestal Bosque de Yotoco (ICN 22807) is a protected  
356 reserve in the Valle del Cauca department on the eastern slopes of the Western  
357 Cordillera. All records are located in the Andean region and the Sierra Nevada de Santa  
358 Marta between 590 and 1690 m.a.s.l. (Fig. 4, Supplementary Data SD1). In Venezuela, *A.*  
359 *latidens* has a similar elevational distribution, with records from 50 to 2240 meters above  
360 sea level and the majority (81%) located between 1000-1500 m.a.s.l. (Handley 1984,  
361 Linares 1986, Soriano et al. 2002).

362 Assessing the conservation status of *A. latidens* in Colombia under the  
363 conventional parameters (variation in population size, size of distribution range and  
364 habitat loss) becomes a challenge given its discontinuous distribution. It is immersed in  
365 highly transformed environments and not associated with natural vegetation cover. Local  
366 abundances are also unknown, but its limited presence in Colombian mammal collections  
367 suggests a pattern of low abundance in the Colombian Andes. Adding to this issue, given  
368 that *A. latidens* is sympatric to *A. geoffroyi*, and only craniodental features are useful for



369 its diagnosis, it is likely that they are misidentified during fieldwork, as suggested by the  
370 fact that all new records for Colombia were previously identified as *A. geoffroyi*. In  
371 summary, *Anoura latidens* is a species with a broad distribution with unknown  
372 population numbers inhabiting highly transformed ecosystems. It is crucial to coordinate  
373 strategies with the different Bat Conservation Programs in South America to encourage  
374 research and conservation on this species, which can lead to effective conservation  
375 strategies.

376 In conclusion, this study provides evidence that *A. carishina* should be treated as a  
377 junior synonym of *A. latidens*, given extensive overlap in morphology, including key  
378 traits such as 1) shape of the upper third premolar (P4), 2) craniodental measurements  
379 and 3) the presence of the anterobasal cusp in the second upper premolar (P3). We found  
380 support for several characters suggested by Handley (1984) to distinguish *A. latidens*  
381 from *A. geoffroyi*, including a shorter rostrum, more robust premolars, and triangular  
382 shape to P4 (with medial-internal cusp being enclosed by the base of the tooth), while we  
383 detected no differences in toothrow angle. Finally, contrary to Handley (1984), we find  
384 that the braincase of *A. latidens* is in fact significantly less inflated than that of *A.*  
385 *geoffroyi*. Given the high morphological overlap between *A. geoffroyi* subspecies and *A.*  
386 *peruana*, we recommend further taxonomic work combined with genetic analyses to  
387 better understand the species limits of this species complex.

388

389

#### ACKNOWLEDGMENTS

390

391

This work was possible thanks to the collaboration of the collection managers of  
multiple mammalogical collections, who provided access to specimens and their internal

392 databases and/or provided scanned images of specimens. We want to thank H. López  
393 Arévalo (ICN), M. Ruedi (MHNG), C.A. Medina Uribe (IAVH), M. Rivas-Pava  
394 (MHNUC), A. Rodríguez-Bolaños (UD), D. Zurc (CSJ), S. Solari (CTUA), B. Patterson  
395 (FMNH), D. Lunde (USNM), and N. Simmons (AMNH). I. Jimenez provided helpful  
396 advice regarding elliptical Fourier transformation analysis.

397

398

#### FUNDING STATEMENT

399 The city of Geneva (Switzerland) provided travel expenses for MRP to review the  
400 Colombian bat specimens deposited in MHNG as the holotype of *A. lasiopyga*. The  
401 American Museum of Natural History (through the Collection Visiting Grant), the  
402 Whitney Harris Center for World Ecology, and the Biology Graduate Student Association  
403 at the University of Missouri-St. Louis provided funds for CAC in order to visit  
404 Colombian and U.S. based mammal collections.

405

406

#### SUPPLEMENTARY DATA

407 Supplementary Data SD 1—Database of specimens examined and their geographical  
408 information including localities and geographical coordinates. Specimens revised and  
409 identified but not measured are indicated with an asterisk (\*)

410 Supplementary Data SD 2—Summary measurements of *A. carishina*, *A. g. geoffroyi*, *A.*  
411 *g. lasiopyga*, *A. peruana* and *A. latidens*.

412 Supplementary Data SD 3— Supplementary Figure 1 Type Series of *A. carishina*, A)

413 Type specimen ICN 14530, B) ICN 14531, C) ICN 5224, D) ICN 5225 E) ICN 5398.

414 Supplementary Figure 2. PCA analyses discriminating between the different

415 species/subspecies of the *A. geoffroyi* species complex, Top) using 12 craniodental and  
416 11 postcranial measurements Bottom) using only the 12 craniodental measurements.  
417 Supplementary Figure 3. Depiction of tooththrow angle measurement.

418 **LITERATURE CITED**

- 419 ALBERICO, M., A. CADENA, J. HERNÁNDEZ-CAMACHO, AND Y. MUÑOZ-SABA. 2000.  
420 Mamíferos (Synapsida: Theria) de Colombia. *Biota colombiana* 1:43-75.  
421 ALLEN, H. 1898. On the Glossophaginae. *Transactions of the American*  
422 *Philosophical Society* 19:237-266.  
423 ARATA, A. A., J. B. VAUGHN, AND M. E. THOMAS. 1967. Food habits of certain  
424 Colombian bats. *Journal of Mammalogy* 48:653-655.  
425 ESTRADA-VILLEGAS, S., J. PÉREZ-TORRES, AND P. R. STEVENSON. 2010. Ensamblaje de  
426 murciélagos en un bosque subandino colombiano y análisis sobre la dieta de algunas  
427 especies. *Mastozoología neotropical* 17:31-41.  
428 GRIFFITHS, T. AND A. GARDNER. 2007 [2008]. Subfamily Glossophaginae  
429 Bonaparte, 1845. Pp. 224-244 in *Mammals of South America, Vol 1 Marsupials,*  
430 *Xenarthrans, Shrews, and Bats* (Gardner A ed.), The University of Chicago Press,  
431 Chicago.  
432 HANDLEY, C. O., JR 1960. Description of new bats from Panama. *Smithsonian*  
433 *Institution*.  
434 HANDLEY, C. O., JR 1976. Mammals of the Smithsonian Venezuelan project.  
435 *Brigham Young University Science Bulletin-Biological Series* 20:1-91.  
436 HANDLEY, C. O., JR 1984. New species of mammals from northern South  
437 America: a long-tongued bat, genus *Anoura* Gray. *Proceedings of the Biological*  
438 *Society of Washington* 97:513-521.  
439 IWATA, H. AND Y. UKAI. 2002. SHAPE: a computer program package for  
440 quantitative evaluation of biological shapes based on elliptic Fourier descriptors.  
441 *Journal of Heredity* 93:384-385.  
442 JARRÍN-V, P. AND T. H. KUNZ. 2008. Taxonomic history of the genus *Anoura*  
443 (Chiroptera: Phyllostomidae) with insights into the challenges of morphological  
444 species delimitation. *Acta Chiropterologica* 10:257-269.  
445 LIM, B. K. AND M. D. ENGSTROM. 2001. Species diversity of bats (Mammalia:  
446 Chiroptera) in Iwokrama Forest, Guyana, and the Guianan subregion: implications  
447 for conservation. *Biodiversity and Conservation* 10:613-657.  
448 LINARES, O. 1986. Murciélagos de Venezuela. *Cuadernos Lagoven, Caracas*.  
449 LINARES, O. 1998. Mamíferos de Venezuela. *Sociedad Conservacionista*  
450 *Audubon de Venezuela, Caracas, Venezuela*.  
451 MANTILLA-MELUK, H. AND R. J. BAKER. 2006. Systematics of small *Anoura*  
452 (Chiroptera: Phyllostomidae) from Colombia, with description of a new species.  
453 *Occasional Papers, Museum of Texas Tech University* 261:1-18.  
454 MANTILLA-MELUK, H. AND R. J. BAKER. 2010. New species of *Anoura* (Chiroptera:  
455 Phyllostomidae) from Colombia, with systematic remarks and notes on the

- 456 distribution of the *A. geoffroyi* complex. Occasional Papers, Museum of Texas Tech  
457 University 292:1-19.
- 458 MOLINARI, J. 1994. A new species of Anoura (Mammalia Chiroptera  
459 Phyllostomidae) from the Andes of northern South America. Tropical Zoology 7:73-  
460 86.
- 461 MORA-BELTRÁN, C. AND H. F. LÓPEZ-ARÉVALO. 2018. Interactions between bats  
462 and oral resources in a premontane forest, Valle del Cauca, Colombia. THERYA  
463 9:129-136.
- 464 MUCHHALA, N., P. V. MENA, AND L. V. ALBUJA. 2005. A new species of Anoura  
465 (Chiroptera: Phyllostomidae) from the Ecuadorian Andes. Journal of Mammalogy  
466 86:457-461.
- 467 MUÑOZ, J. 2001. Los murciélagos de Colombia. Sistemática, distribución,  
468 descripción, historia natural y ecología. Editorial Universidad de Antioquia,  
469 Medellín, Antioquia, Colombia.
- 470 NAGORSEN, D. AND J. TAMSITT. 1981. Systematics of *Anoura cultrata*, *A.*  
471 *brevirostrum*, and *A. werckleae*. Journal of Mammalogy 62:82-100.
- 472 PACHECO, V., P. SÁNCHEZ-VENDIZÚ, AND S. SOLARI. 2018. A New Species of *Anoura*  
473 *Gray, 1838* (Chiroptera: Phyllostomidae) from Peru, with Taxonomic and  
474 Biogeographic Comments on Species of the *Anoura caudifer* Complex. Acta  
475 Chiropterologica 20:31-50.
- 476 RIVAS-PAVA, M., H. RAMÍREZ-CHAVES, Z. ÁLVAREZ, AND B. NIÑO-VALENCIA. 2007.  
477 Catálogo de los mamíferos presentes en las colecciones de referencia y exhibición  
478 del Museo de Historia Natural de la Universidad del Cauca. Taller Editorial  
479 Universidad del Cauca, Popayán.
- 480 SCHNEIDER, C. A., W. S. RASBAND, AND K. W. ELICEIRI. 2012. NIH Image to ImageJ:  
481 25 years of image analysis. Nature methods 9:671.
- 482 SOLARI, S., Y. MUÑOZ-SABA, J. V. RODRÍGUEZ-MAHECHA, T. R. DEFLER, H. E. RAMÍREZ-  
483 CHAVES, AND F. TRUJILLO. 2013. Riqueza, endemismo y conservación de los mamíferos  
484 de Colombia. Mastozoología neotropical 20:301-365.
- 485 SOLARI, S., V. PACHECO, AND E. VIVAR. 1999. Nuevos registros distribucionales de  
486 murciélagos peruanos. Revista Peruana de Biología 6:152-159.
- 487 SORIANO, P. J., A. RUIZ, AND A. ARENDS. 2002. Physiological Responses to Ambient  
488 Temperature Manipulation by three Species of Bats from Andean Cloud Forests.  
489 Journal of Mammalogy 83:445-457.
- 490 VELAZCO, P. M. 2005. Morphological phylogeny of the bat genus *Platyrrhinus*  
491 *Saussure, 1860* (Chiroptera: Phyllostomidae) with the description of four new  
492 species. Fieldiana Zoology:1-53.
- 493 VELAZCO, P. M. AND B. D. PATTERSON. 2008. Phylogenetics and biogeography of  
494 the broad-nosed bats, genus *Platyrrhinus* (Chiroptera: Phyllostomidae). Molecular  
495 Phylogenetics and Evolution 49:749-759.
- 496 VELAZCO, P. M. AND N. B. SIMMONS. 2011. Systematics and taxonomy of great  
497 striped-faced bats of the genus *Vampyroides* Thomas, 1900 (Chiroptera:  
498 Phyllostomidae). American Museum Novitates 3710:1-35.
- 499 WILSON, D. E. AND D. REEDER. 1993. Mammal species of the world. Smithsonian  
500 Institution Press, WashingtonDC.
- 501

502

## FIGURE LEGENDS

503 Fig. 1. Skull morphology of A) *A. latidens* type AMNH 370119, B) *A. carishina* type  
504 ICN 14530 and C) *A. carishina* paratype ICN 5938. Note the robust molars and  
505 premolars in the first two, in contrast to the slender premolars of the *A. carishina*  
506 paratype ICN 5938.

507

508 Fig. 2. A) PCA analyses using 12 craniodental and 11 postcranial measurements of  
509 *Anoura* specimens. B) PCA analyses using only the 12 craniodental measurements of  
510 *Anoura carishina*, *A. latidens* and *A. geoffroyi* species complex specimens.

511

512 Fig. 3. A) Mean (solid lines), -2SD (short-dashed lines), and + 2SD (long-dashed lines)  
513 contour shapes of the third premolar (P4) in our sample (with all three super-imposed to  
514 the left), showing the variation explained by each of the elliptical Fourier descriptor  
515 (EFD) Principal Components. B) Scatterplot of EFD PC1 vs. P4 area. Note that the *A.*  
516 *carishina* type specimen (ICN 14530) is nested well within the morphospace of *A.*  
517 *latidens*.

518

519 Fig. 4. Distribution of *A. latidens* in Colombia. Black stars show specimens previously  
520 attributed to *A. carishina*, while grey stars show all other records.

521 Tables

522 Table 1. Measurements (mm) of the type specimen of *A. latidens*, and the type series of *A.*

523 *carishina*, see methods for measurement abbreviations.

|               | <i>A. latidens</i> Type | <i>A. carishina</i> Type | <i>A. carishina</i> | <i>A. carishina</i> | <i>A. carishina</i> | <i>A. carishina</i> |
|---------------|-------------------------|--------------------------|---------------------|---------------------|---------------------|---------------------|
|               | USNM 370119             | ICN 14530                | ICN 5224            | ICN 5225            | ICN 14531           | ICN 5938            |
| <b>GLS</b>    | 24.05                   | 24.08                    | 24.44               | 24.05               | 23.90               | 24.12               |
| <b>CBL</b>    | 23.27                   | 23.35                    | 23.65               | 23.53               | 23.45               | 23.52               |
| <b>ZW</b>     | 10.66                   | 10.95                    | 9.93                | 9.97                | 10.59               | 10.70               |
| <b>PB</b>     | 4.81                    | 5.24                     | 4.91                | 4.86                | 5.19                | 5.15                |
| <b>BCB</b>    | 9.50                    | 10.03                    | 9.81                | 9.35                | 9.82                | 9.88                |
| <b>MB</b>     | 9.99                    | 10.11                    | 9.75                | 10.02               | 10.17               | 10.22               |
| <b>MTRL</b>   | 9.06                    | 9.09                     | 9.32                | 9.18                | 9.01                | 9.28                |
| <b>PL</b>     | 13.44                   | 12.27                    | 12.52               | 12.71               | 12.87               | 13.11               |
| <b>PPL</b>    | 8.79                    | 9.57                     | 9.01                | 9.40                | 9.17                | 8.71                |
| <b>M3-M3</b>  | 5.94                    | 6.31                     | 6.22                | 5.91                | 6.09                | 6.06                |
| <b>C-C</b>    | 4.09                    | 4.46                     | 4.39                | 4.06                | 4.16                | 4.52                |
| <b>CW</b>     | 6.08                    | 6.23                     | 5.89                | 5.90                | 5.73                | 6.26                |
| <b>HBC</b>    | 7.54                    | 8.30                     | 8.04                | 7.91                | 7.83                | 7.72                |
| <b>MANL</b>   | 16.89                   | 17.15                    | 17.46               | 17.00               | 17.27               | 17.36               |
| <b>MANTRL</b> | 9.35                    | 9.71                     | 9.48                | 9.48                | 9.39                | 9.63                |
| <b>MH</b>     | 4.44                    | 4.67                     | 5.06                | 4.57                | 4.45                | 4.69                |
| <b>FA</b>     | 42.69                   | 43.09                    | 44.15               | 43.79               | 41.14               | 41.07               |
| <b>D3MC</b>   | 39.53                   | 39.32                    | 39.24               | 39.86               | 38.22               | 39.11               |
| <b>D3P1</b>   | 13.21                   | 13.69                    | 13.48               | 13.00               | 13.47               | 12.81               |
| <b>D3P2</b>   | 21.18                   | 20.42                    | 20.50               | 21.18               | 21.01               | 20.47               |
| <b>D4MC</b>   | 37.88                   | 37.09                    | 38.97               | 38.37               | 36.43               | 37.73               |

---

|              |       |       |       |       |       |       |
|--------------|-------|-------|-------|-------|-------|-------|
| <b>D4P1</b>  | 9.73  | 9.64  | 10.20 | 10.07 | 10.26 | 9.97  |
| <b>D4P2</b>  | 13.32 | 14.24 | 13.65 | 15.03 | 14.11 | 14.08 |
| <b>D5MC</b>  | 33.57 | 32.64 | 33.56 | 33.07 | 30.89 | 32.62 |
| <b>D5P1</b>  | 7.81  | 8.20  | 8.20  | 8.00  | 8.68  | 8.06  |
| <b>D5P2</b>  | 11.92 | 11.62 | 12.65 | 13.22 | 12.34 | 12.61 |
| <b>Tibia</b> | 14.97 | 13.64 | 15.05 | 15.40 | 14.73 | 14.34 |

---

524

525

526

527

528

529

530

531

532

533

534

535

536

537

538

539

540

541 Table 2. MANOVA *F* values and *P*-values for Bonferroni-corrected posthoc tests of morphometric variables between *Anoura*  
 542 *peruana* (*n*=5), *A. carishina* (*n*=5), *A. geoffroyi* (*n*=75) and *A. latidens* (*n*=40), with significant *P*-values in bold. See methods for  
 543 measurement abbreviations.

| Variable | MANOVA <i>F</i> | MANOVA <i>P</i> | <i>A. latidens</i> -<br><i>A. carishina</i> | <i>A. geoffroyi</i> -<br><i>A. carishina</i> | <i>A. peruana</i> -<br><i>A. carishina</i> | <i>A. geoffroyi</i> -<br><i>A. latidens</i> | <i>A. peruana</i> -<br><i>A. latidens</i> | <i>A. geoffroyi</i> -<br><i>A. peruana</i> |
|----------|-----------------|-----------------|---------------------------------------------|----------------------------------------------|--------------------------------------------|---------------------------------------------|-------------------------------------------|--------------------------------------------|
| GLS      | <b>33.013</b>   | <b>0.000</b>    | 1.000                                       | <b>0.001</b>                                 | <b>0.001</b>                               | <b>0.000</b>                                | <b>0.000</b>                              | 1.000                                      |
| CBL      | <b>25.771</b>   | <b>0.000</b>    | 1.000                                       | <b>0.001</b>                                 | <b>0.006</b>                               | <b>0.000</b>                                | <b>0.001</b>                              | 1.000                                      |
| PB       | <b>1.023</b>    | 0.385           | 1.000                                       | 1.000                                        | 0.867                                      | 1.000                                       | 1.000                                     | 0.607                                      |
| BCB      | <b>5.587</b>    | <b>0.001</b>    | 1.000                                       | 1.000                                        | 1.000                                      | <b>0.001</b>                                | 1.000                                     | 0.354                                      |
| HBC      | <b>5.625</b>    | <b>0.001</b>    | <b>0.030</b>                                | 0.295                                        | <b>0.005</b>                               | 0.166                                       | 0.500                                     | <b>0.043</b>                               |
| MB       | <b>9.297</b>    | <b>0.000</b>    | 1.000                                       | <b>0.047</b>                                 | 1.000                                      | <b>0.000</b>                                | 1.000                                     | 0.255                                      |
| PL       | <b>21.262</b>   | <b>0.000</b>    | 1.000                                       | <b>0.001</b>                                 | <b>0.001</b>                               | <b>0.000</b>                                | <b>0.000</b>                              | 0.787                                      |
| MTRL     | <b>9.982</b>    | <b>0.000</b>    | 1.000                                       | 0.087                                        | 0.120                                      | <b>0.000</b>                                | <b>0.003</b>                              | 0.415                                      |
| M3.M3    | <b>3.094</b>    | <b>0.030</b>    | 1.000                                       | 1.000                                        | 1.000                                      | <b>0.021</b>                                | 0.902                                     | 1.000                                      |
| C.C      | <b>17.085</b>   | <b>0.000</b>    | 1.000                                       | 0.058                                        | 1.000                                      | <b>0.001</b>                                | 1.000                                     | 0.387                                      |
| MANL     | <b>5.034</b>    | <b>0.003</b>    | 1.000                                       | 0.515                                        | 0.211                                      | <b>0.009</b>                                | 0.850                                     | 1.000                                      |
| MANTRL   | <b>14.744</b>   | <b>0.000</b>    | 1.000                                       | <b>0.012</b>                                 | <b>0.002</b>                               | <b>0.000</b>                                | <b>0.000</b>                              | 0.417                                      |
| FA       | <b>0.223</b>    | 0.881           | 1.000                                       | 1.000                                        | 1.000                                      | 1.000                                       | 1.000                                     | 1.000                                      |



544 Table 3. MANOVA *F* and *P*-values for Bonferroni-corrected posthoc tests of P3 and P4 area, tooththrow angles (TRA) and Principal  
 545 components 1 and 2 of P4 shape between *Anoura peruana* (n=4), *A. carishina* (n=5), *A. g. geoffroyi* (n=34) and *A. latidens* (n=66),  
 546 with significant *P*-values in bold. See methods for measurement abbreviations.

547

| Variable            | MANOVA <i>F</i> | MANOVA <i>P</i> | <i>A. latidens</i> -<br><i>A. carishina</i> | <i>A. g. geoffroyi</i> -<br><i>A. carishina</i> | <i>A. peruana</i> -<br><i>A. carishina</i> | <i>A. g. geoffroyi</i> -<br><i>A. latidens</i> | <i>A. peruana</i> -<br><i>A. latidens</i> | <i>A. g. geoffroyi</i> -<br><i>A. peruana</i> |
|---------------------|-----------------|-----------------|---------------------------------------------|-------------------------------------------------|--------------------------------------------|------------------------------------------------|-------------------------------------------|-----------------------------------------------|
| <b>P3 area</b>      | 0.952           | 0.418           | 1.000                                       | 1.000                                           | 1.000                                      | 0.641                                          | 1.000                                     | 1.000                                         |
| <b>P4 area</b>      | 14.878          | <b>0.000</b>    | <b>0.049</b>                                | 1.000                                           | 1.000                                      | <b>0.000</b>                                   | <b>0.002</b>                              | <b>1.000</b>                                  |
| <b>P4 Shape PC1</b> | 103.508         | <b>0.000</b>    | 0.678                                       | <b>0.000</b>                                    | 0.079                                      | <b>0.000</b>                                   | <b>0.000</b>                              | 0.122                                         |
| <b>P4 Shape PC2</b> | 0.340           | 0.797           | 1.000                                       | 1.000                                           | 1.000                                      | 1.000                                          | 1.000                                     | 1.000                                         |
| <b>TRA</b>          | 3.157           | <b>0.028</b>    | 1.000                                       | 1.000                                           | 1.000                                      | 0.066                                          | 0.407                                     | 1.000                                         |

548

549

550

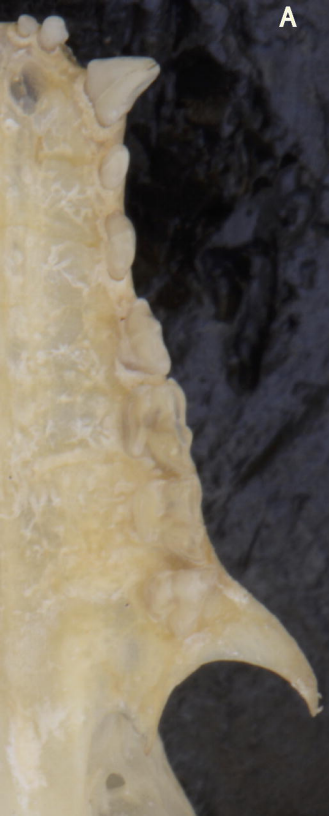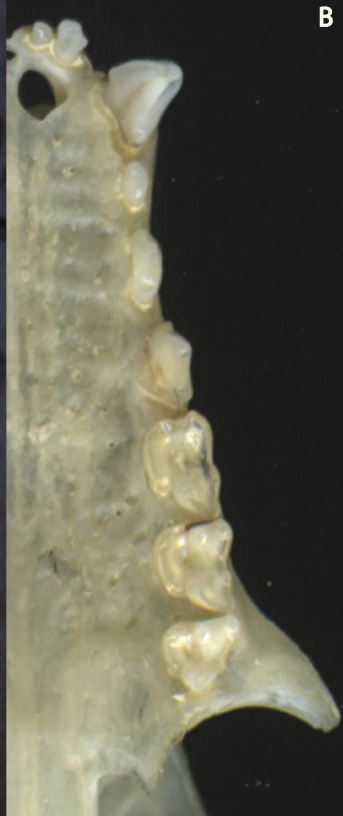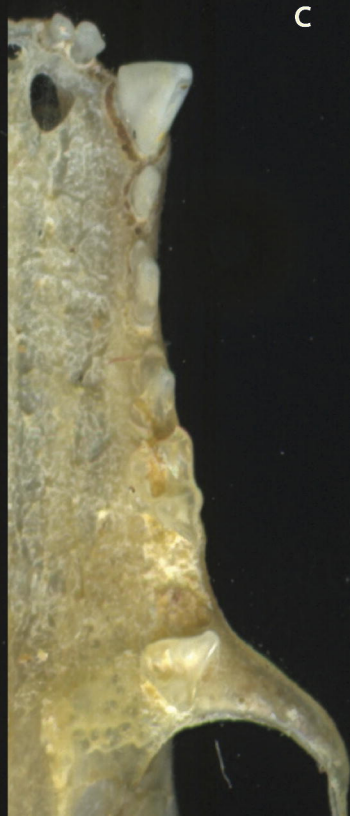

**A**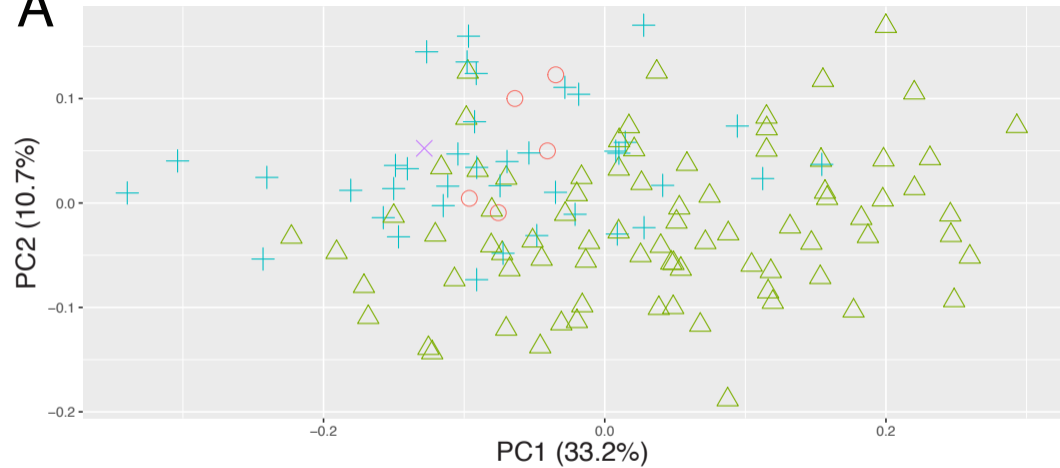**B**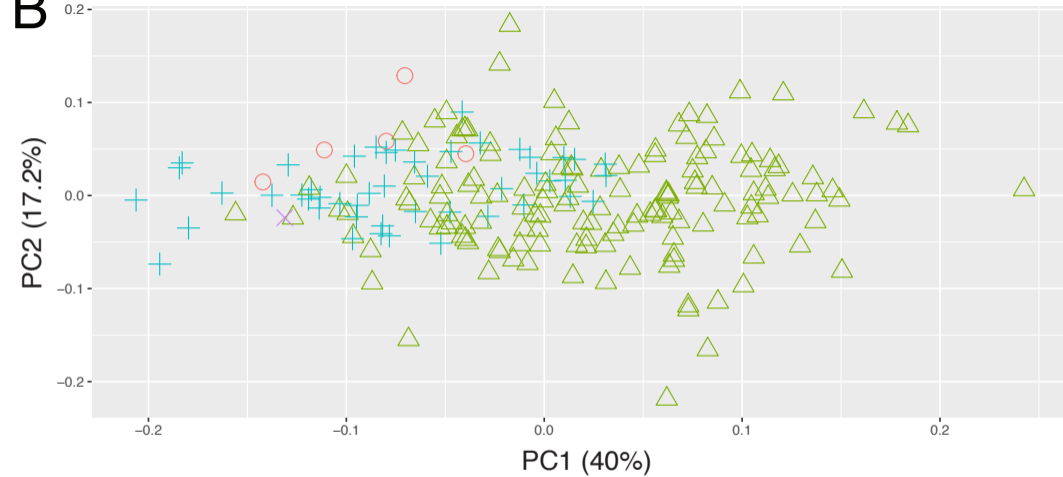

Species

○ *A. carishina*    + *A. latidens*    × *A. latidens* Type    △ *A. geoffroyi* species complex

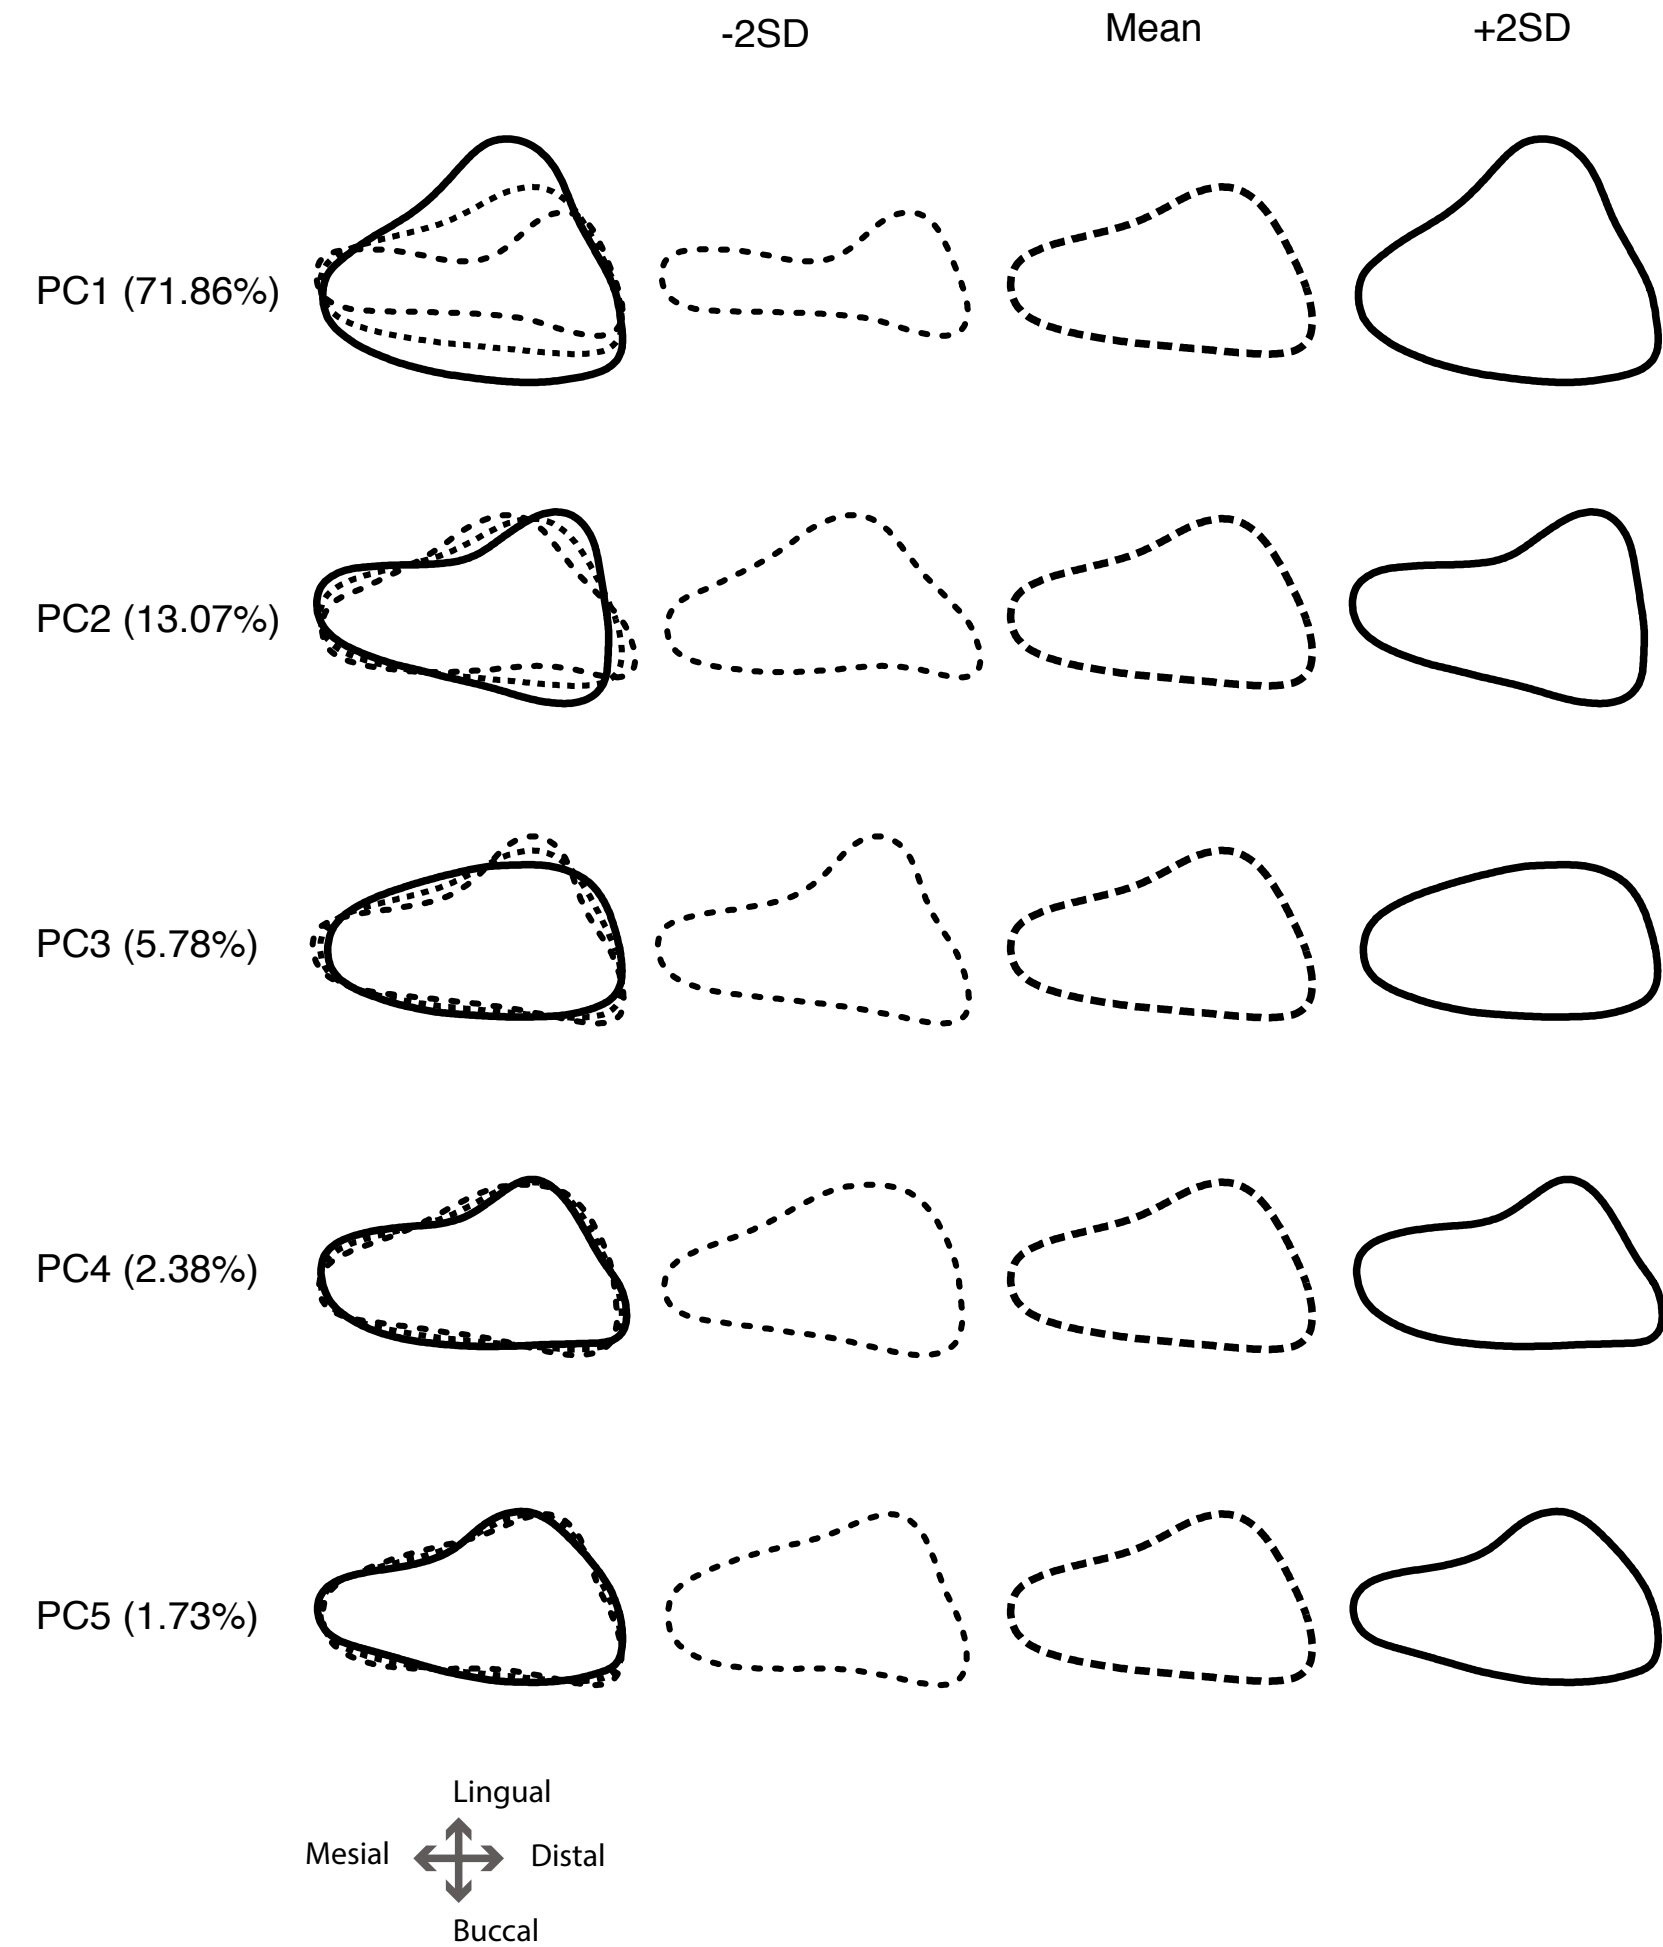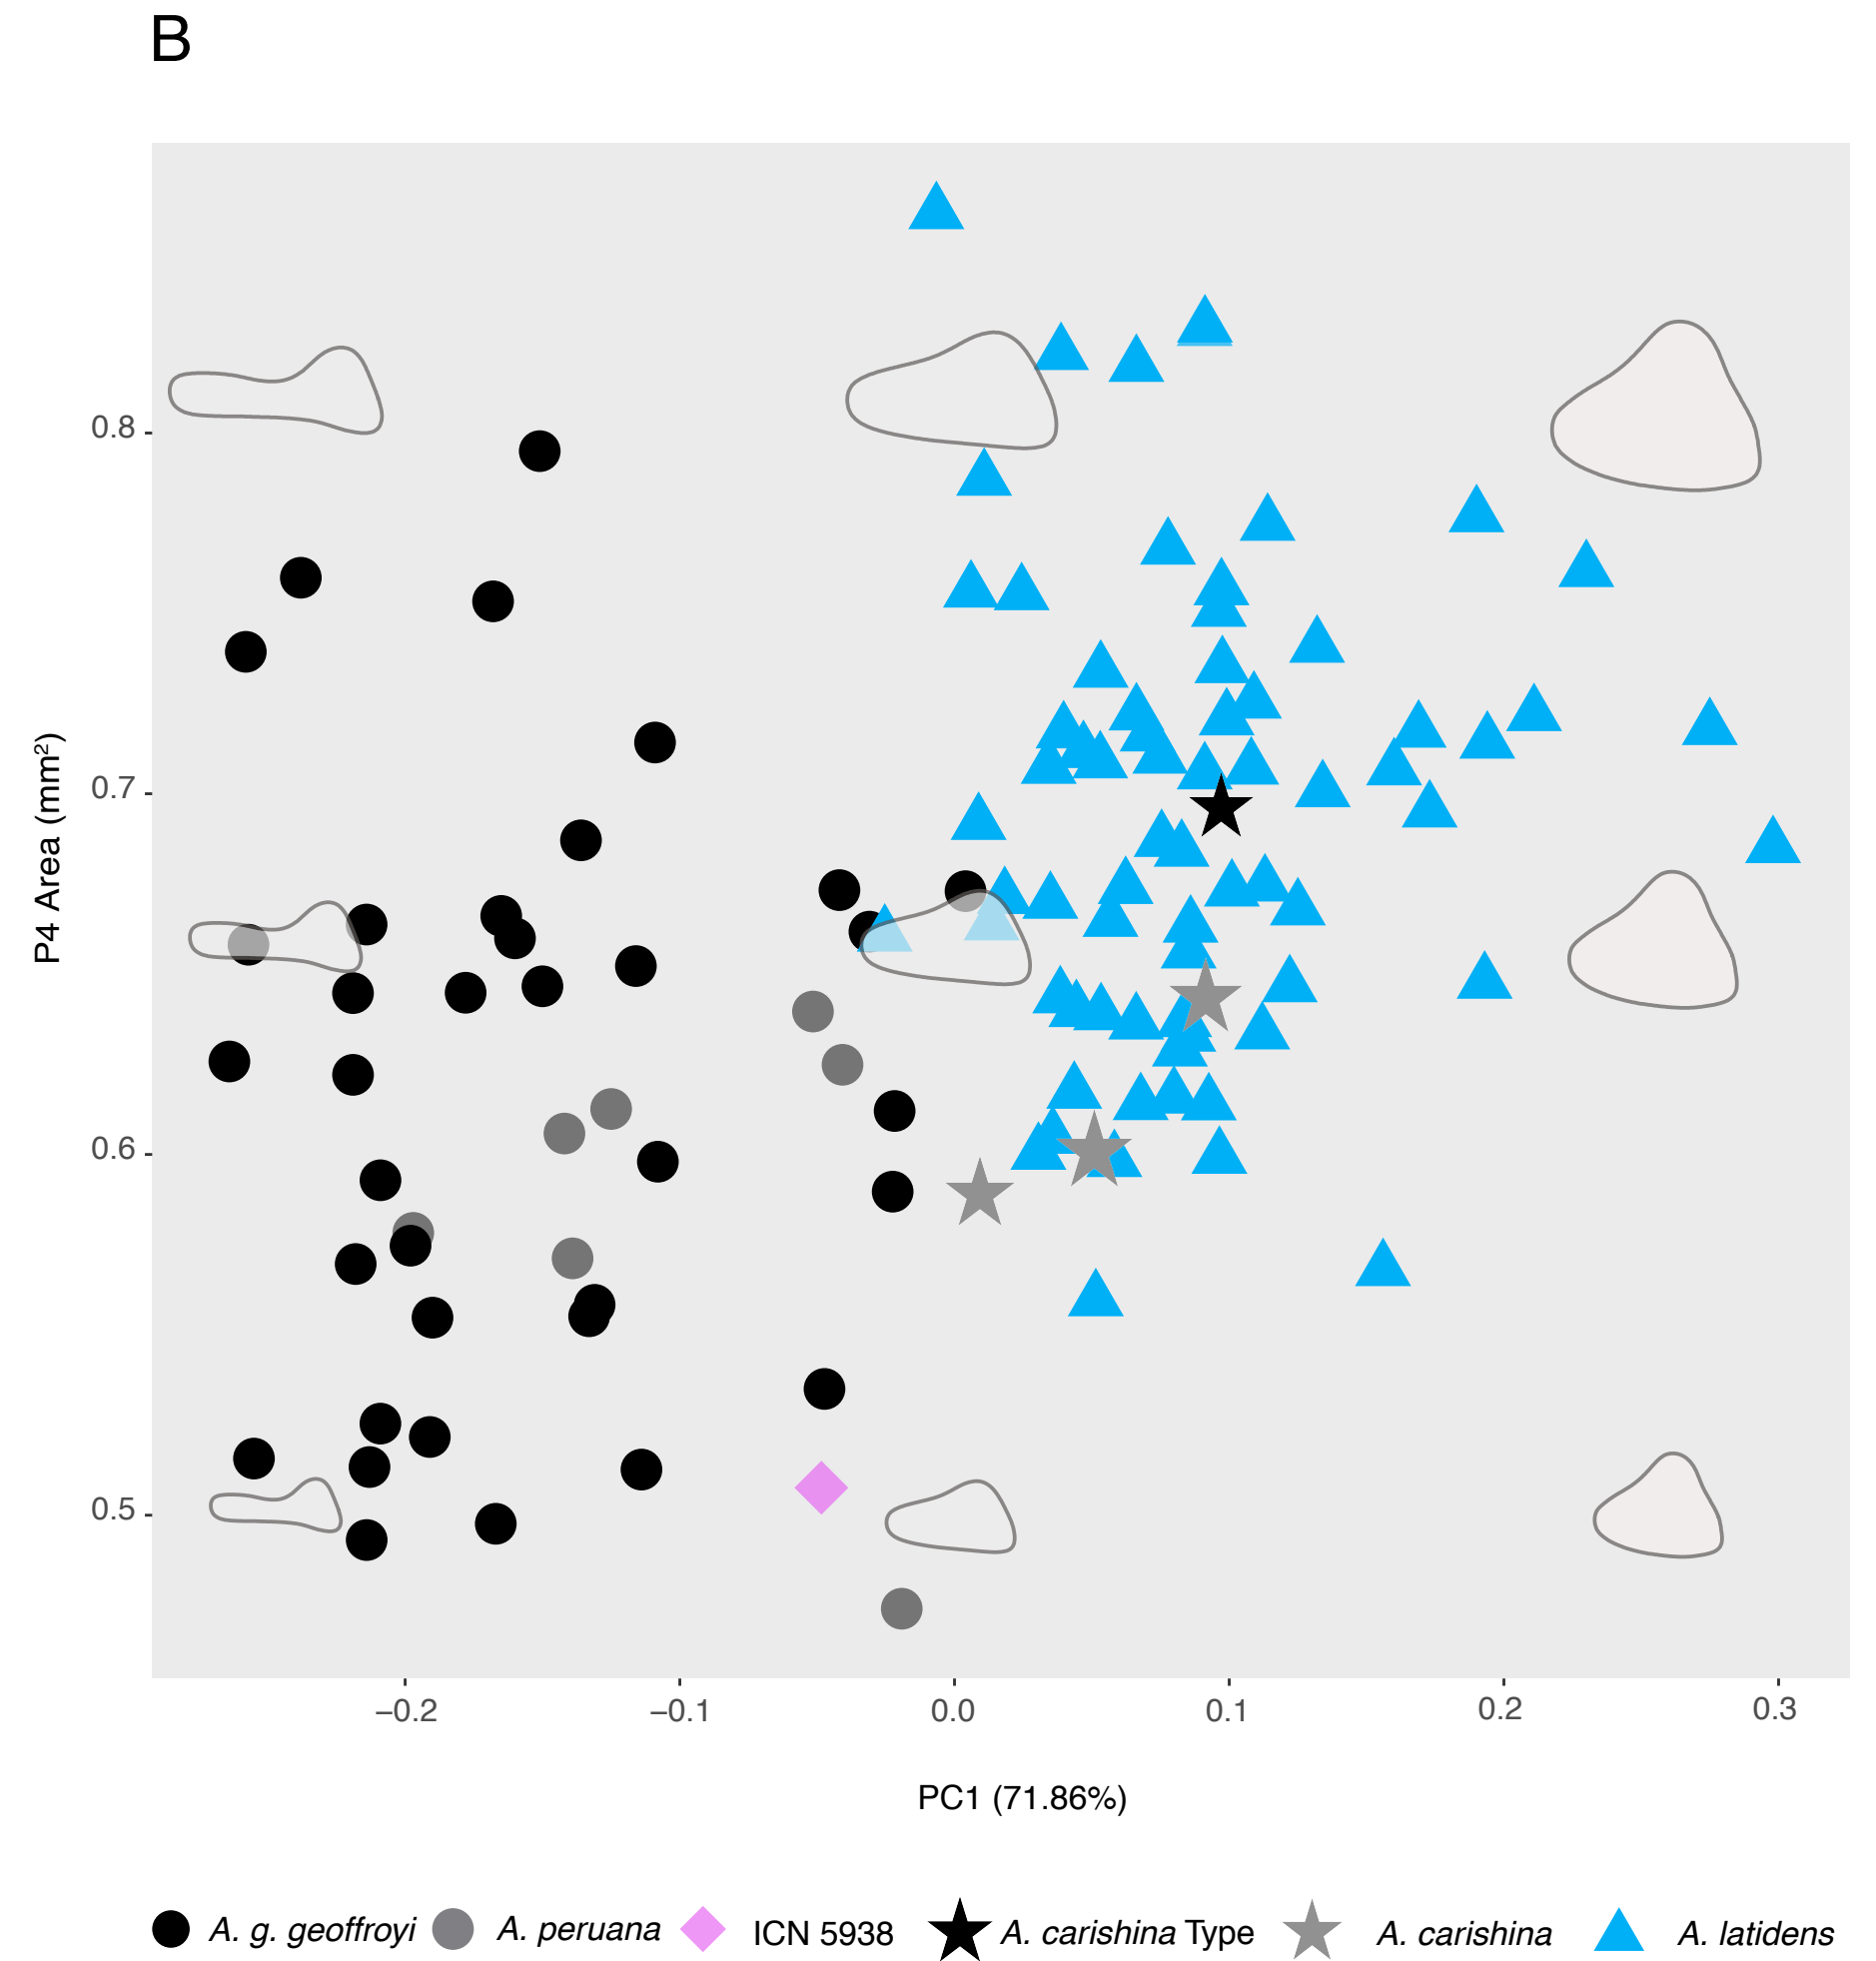

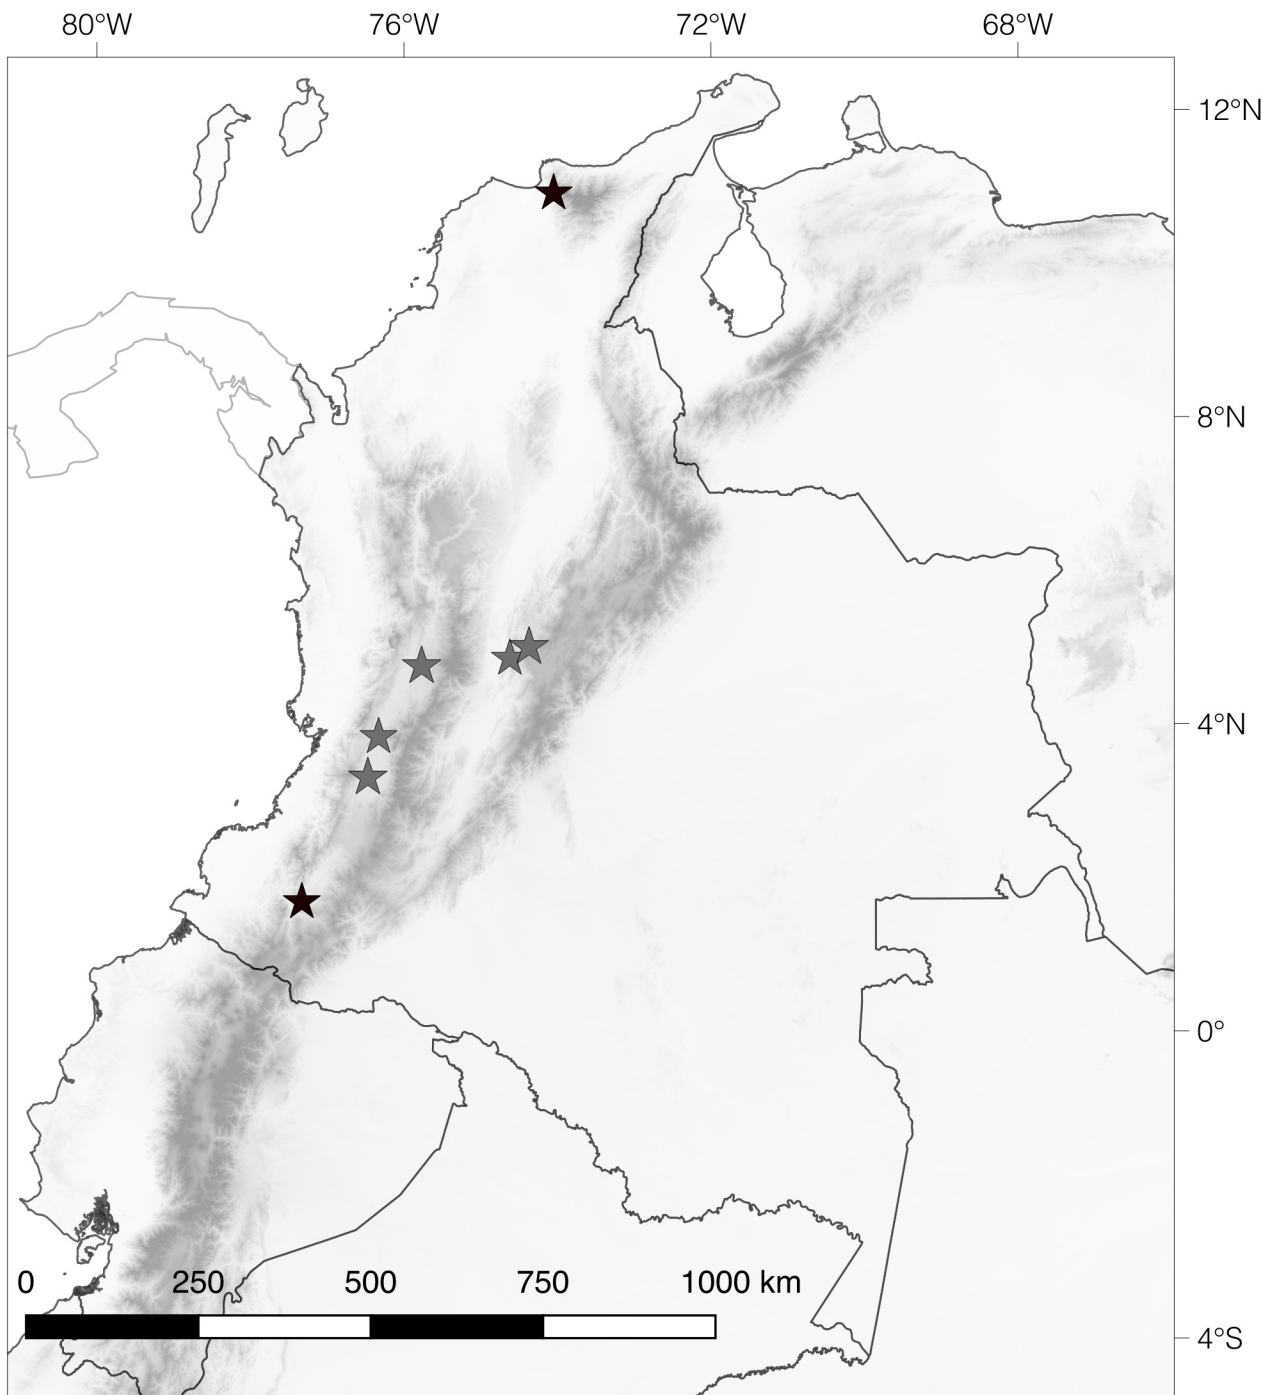

Source: https://www.biorxiv.org/content/10.1101/462051v1.full.pdf
